# Supplementary material
Source: HighWire-hosted journal article supplement (https://cmaj.ca/highwire/filestream/59435/field_highwire_adjunct_files/2/150234-res-3-at.pdf)
Supplement: 150234-res-3-at.pdf [file 150234-res-3-at.pdf]

### Appendix 3 (as supplied by the authors): Results of Sensitivity Analyses

| Table A: Results of 2-part regression model predicting health care utilization and total health care costs over a 12 month period, including Ontario Drug Benefit costs.                                                                                                                                                                                                                  |                                                                    |               |                                                               |               |
|-------------------------------------------------------------------------------------------------------------------------------------------------------------------------------------------------------------------------------------------------------------------------------------------------------------------------------------------------------------------------------------------|--------------------------------------------------------------------|---------------|---------------------------------------------------------------|---------------|
|                                                                                                                                                                                                                                                                                                                                                                                           | Adjusted odds of health care expenditures <sup>i</sup><br>n=67 033 |               | Total health care costs per person <sup>ii</sup><br>n= 59 817 |               |
|                                                                                                                                                                                                                                                                                                                                                                                           | OR <sup>iii</sup>                                                  | (95% CI)      | Mean <sup>iii</sup> , \$                                      | (95% CI)      |
| <b>Food insecurity status</b>                                                                                                                                                                                                                                                                                                                                                             |                                                                    |               |                                                               |               |
| Food secure                                                                                                                                                                                                                                                                                                                                                                               | 1.00                                                               | (reference)   | 1515                                                          | (1497 - 1533) |
| Marginally food insecure                                                                                                                                                                                                                                                                                                                                                                  | 1.15                                                               | (1.01 - 1.31) | 1869                                                          | (1762 - 1976) |
| Moderately food insecure                                                                                                                                                                                                                                                                                                                                                                  | 1.38                                                               | (1.22 - 1.57) | 2256                                                          | (2144 - 2368) |
| Severely food insecure                                                                                                                                                                                                                                                                                                                                                                    | 1.74                                                               | (1.46 - 2.08) | 3348                                                          | (3134 - 3562) |
| Age, in years                                                                                                                                                                                                                                                                                                                                                                             | 1.02                                                               | (1.02 - 1.02) | 1601                                                          | (1583 - 1618) |
| <b>Sex</b>                                                                                                                                                                                                                                                                                                                                                                                |                                                                    |               |                                                               |               |
| Male                                                                                                                                                                                                                                                                                                                                                                                      | 1.00                                                               | (reference)   | 1211                                                          | (1191 - 1232) |
| Female                                                                                                                                                                                                                                                                                                                                                                                    | 3.00                                                               | (2.84 - 3.16) | 1983                                                          | (1953 - 2012) |
| <b>Educational attainment</b>                                                                                                                                                                                                                                                                                                                                                             |                                                                    |               |                                                               |               |
| Post-secondary school graduate                                                                                                                                                                                                                                                                                                                                                            | 1.00                                                               | (reference)   | 1562                                                          | (1540 - 1585) |
| Less than secondary school completion                                                                                                                                                                                                                                                                                                                                                     | 1.04                                                               | (0.96 - 1.13) | 1923                                                          | (1858 - 1988) |
| Secondary school graduate                                                                                                                                                                                                                                                                                                                                                                 | 0.94                                                               | (0.88 - 1.01) | 1568                                                          | (1527 - 1608) |
| Some post-secondary school                                                                                                                                                                                                                                                                                                                                                                | 1.09                                                               | (0.99 - 1.19) | 1559                                                          | (1498 - 1620) |
| <b>Homeowner</b>                                                                                                                                                                                                                                                                                                                                                                          |                                                                    |               |                                                               |               |
| Yes                                                                                                                                                                                                                                                                                                                                                                                       | 1.00                                                               | (reference)   | 1520                                                          | (1500 - 1540) |
| No                                                                                                                                                                                                                                                                                                                                                                                        | 0.78                                                               | (0.73 - 0.83) | 1917                                                          | (1866 - 1967) |
| Number of children in household <18 years                                                                                                                                                                                                                                                                                                                                                 | 1.10                                                               | (1.07 - 1.13) | 1601                                                          | (1583 - 1618) |
| Number of adults in household                                                                                                                                                                                                                                                                                                                                                             | 1.04                                                               | (1.01 - 1.08) | 1601                                                          | (1583 - 1618) |
| <b>Neighborhood income quintile</b>                                                                                                                                                                                                                                                                                                                                                       |                                                                    |               |                                                               |               |
| 1 (lowest)                                                                                                                                                                                                                                                                                                                                                                                | 1.00                                                               | (reference)   | 1673                                                          | (1629 - 1717) |
| 2                                                                                                                                                                                                                                                                                                                                                                                         | 1.00                                                               | (0.92 - 1.08) | 1596                                                          | (1557 - 1636) |
| 3                                                                                                                                                                                                                                                                                                                                                                                         | 1.00                                                               | (0.92 - 1.08) | 1571                                                          | (1532 - 1610) |
| 4                                                                                                                                                                                                                                                                                                                                                                                         | 1.09                                                               | (1.00 - 1.18) | 1586                                                          | (1546 - 1625) |
| 5 (highest)                                                                                                                                                                                                                                                                                                                                                                               | 1.11                                                               | (1.02 - 1.21) | 1581                                                          | (1541 - 1621) |
| <sup>i</sup> Part 1: Logistic regression to estimate the odds of incurring any versus no health care cost over a 12 month period, including Ontario Drug Benefit costs.                                                                                                                                                                                                                   |                                                                    |               |                                                               |               |
| <sup>ii</sup> Part 2: Ordinary Least-Squares regression to determine the total health care cost associated with each variable, conditional on incurring any cost over the 12 month period, including Ontario Drug Benefit costs. Costs were adjusted to 2012 Canadian dollars. Model estimates have been retransformed to provide the predicted cost at the mean value for each variable. |                                                                    |               |                                                               |               |
| <sup>iii</sup> Adjusted for all other variables in the table.                                                                                                                                                                                                                                                                                                                             |                                                                    |               |                                                               |               |
| CI = confidence interval                                                                                                                                                                                                                                                                                                                                                                  |                                                                    |               |                                                               |               |

Table B: Results of 2-part regression model predicting health care utilization and total health care costs over a 12 month period, including only those adults with complete data on household income.

|                                                                                                                                                                                                                                                                                                                                                                                                                                                                                                                                                                                                                       | Adjusted odds of health care expenditures <sup>i</sup><br>n = 52 663 |               | Total health care costs per person <sup>ii</sup><br>n = 46 951 |               |
|-----------------------------------------------------------------------------------------------------------------------------------------------------------------------------------------------------------------------------------------------------------------------------------------------------------------------------------------------------------------------------------------------------------------------------------------------------------------------------------------------------------------------------------------------------------------------------------------------------------------------|----------------------------------------------------------------------|---------------|----------------------------------------------------------------|---------------|
|                                                                                                                                                                                                                                                                                                                                                                                                                                                                                                                                                                                                                       | OR <sup>iii</sup>                                                    | (95% CI)      | Mean <sup>iii</sup> ,<br>\$                                    | (95% CI)      |
| <b>Food insecurity status</b>                                                                                                                                                                                                                                                                                                                                                                                                                                                                                                                                                                                         |                                                                      |               |                                                                |               |
| Food secure                                                                                                                                                                                                                                                                                                                                                                                                                                                                                                                                                                                                           | 1.00                                                                 | (reference)   | 1438                                                           | (1419 - 1458) |
| Marginally food insecure                                                                                                                                                                                                                                                                                                                                                                                                                                                                                                                                                                                              | 1.16                                                                 | (1.00 - 1.35) | 1669                                                           | (1561 - 1776) |
| Moderately food insecure                                                                                                                                                                                                                                                                                                                                                                                                                                                                                                                                                                                              | 1.35                                                                 | (1.18 - 1.55) | 1891                                                           | (1786 - 1996) |
| Severely food insecure                                                                                                                                                                                                                                                                                                                                                                                                                                                                                                                                                                                                | 1.76                                                                 | (1.46 - 2.12) | 2599                                                           | (2418 - 2779) |
| <b>Age</b>                                                                                                                                                                                                                                                                                                                                                                                                                                                                                                                                                                                                            |                                                                      |               |                                                                |               |
| <b>Sex</b>                                                                                                                                                                                                                                                                                                                                                                                                                                                                                                                                                                                                            |                                                                      |               |                                                                |               |
| Male                                                                                                                                                                                                                                                                                                                                                                                                                                                                                                                                                                                                                  | 1.00                                                                 | (reference)   | 1138                                                           | (1117 - 1159) |
| Female                                                                                                                                                                                                                                                                                                                                                                                                                                                                                                                                                                                                                | 3.03                                                                 | (2.85 - 3.22) | 1879                                                           | (1848 - 1911) |
| <b>Educational attainment</b>                                                                                                                                                                                                                                                                                                                                                                                                                                                                                                                                                                                         |                                                                      |               |                                                                |               |
| Post-secondary school graduate                                                                                                                                                                                                                                                                                                                                                                                                                                                                                                                                                                                        | 1.00                                                                 | (reference)   | 1493                                                           | (1470 - 1517) |
| Less than secondary school completion                                                                                                                                                                                                                                                                                                                                                                                                                                                                                                                                                                                 | 1.00                                                                 | (0.91 - 1.10) | 1655                                                           | (1590 - 1720) |
| Secondary school graduate                                                                                                                                                                                                                                                                                                                                                                                                                                                                                                                                                                                             | 0.94                                                                 | (0.88 - 1.02) | 1456                                                           | (1413 - 1499) |
| Some post-secondary school                                                                                                                                                                                                                                                                                                                                                                                                                                                                                                                                                                                            | 1.06                                                                 | (0.96 - 1.18) | 1433                                                           | (1369 - 1497) |
| <b>Homeowner</b>                                                                                                                                                                                                                                                                                                                                                                                                                                                                                                                                                                                                      |                                                                      |               |                                                                |               |
| Yes                                                                                                                                                                                                                                                                                                                                                                                                                                                                                                                                                                                                                   | 1.00                                                                 | (reference)   | 1451                                                           | (1430 - 1472) |
| No                                                                                                                                                                                                                                                                                                                                                                                                                                                                                                                                                                                                                    | 0.77                                                                 | (0.72 - 0.83) | 1667                                                           | (1618 - 1715) |
| Number of children in household <18 years                                                                                                                                                                                                                                                                                                                                                                                                                                                                                                                                                                             | 1.11                                                                 | (1.07 - 1.14) | 1498                                                           | (1479 - 1517) |
| Number of adults in household                                                                                                                                                                                                                                                                                                                                                                                                                                                                                                                                                                                         | 1.06                                                                 | (1.02 - 1.10) | 1498                                                           | (1479 - 1517) |
| Household income                                                                                                                                                                                                                                                                                                                                                                                                                                                                                                                                                                                                      | 1.00                                                                 | (1.00 - 1.00) | 1498                                                           | (1479 - 1517) |
| <sup>i</sup> Part 1: Logistic regression to estimate the odds of incurring any versus no health care cost over a 12 month period, excluding Ontario Drug Benefit.<br><sup>ii</sup> Part 2: Ordinary Least-Squares regression to determine the total health care cost associated with each variable, conditional on incurring any cost over the 12 month period. Costs were adjusted to 2012 Canadian dollars. Model estimates have been retransformed to provide the predicted cost at the mean value for each variable.<br><sup>iii</sup> Adjusted for all other variables in the table.<br>CI = confidence interval |                                                                      |               |                                                                |               |
